# Supplementary material for: Bone marrow adipocytes drive the development of tissue invasive Ly6Chigh monocytes during obesity
Source: eLife journal article supplement (doi:10.7554/elife.65553), 2022-09-08
Supplement: supp [file elife-65553-supp-v1.zip]

Archive with 18 entries (18 files):
- elife_poa_e65553_Figure_2_figure_supplement_1.pdf
- elife_poa_e65553_Figure_2_figure_supplement_2.pdf
- elife_poa_e65553_Figure_3_figure_supplement_1.pdf
- elife_poa_e65553_Figure_5_figure_supplement_1.pdf
- elife_poa_e65553_Figure_7_figure_supplement_1.pdf
- elife_poa_e65553_Transparent_Reporting_File.pdf
- elife_poa_e65553_Figure_1_source_data_1.xlsx
- elife_poa_e65553_Figure_2_source_data_1.xlsx
- elife_poa_e65553_Figure_3_source_data_1.xlsx
- elife_poa_e65553_Figure_4_source_data_1.xlsx
- elife_poa_e65553_Figure_5_source_data_1.xlsx
- elife_poa_e65553_Figure_6_source_data_1.xlsx
- elife_poa_e65553_Figure_7_source_data_1.xlsx
- elife_poa_e65553_Figure_8_source_data_1.xlsx
- elife_poa_e65553_Figure_2_figure_supplement_2_source_data_1.xlsx
- elife_poa_e65553_Figure_3_figure_supplement_1_source_data_1.xlsx
- elife_poa_e65553_Figure_5_figure_supplement_1_source_data_1.xlsx
- elife_poa_e65553_Figure_7_figure_supplement_1_source_data_1.xlsx
