# Supplementary material for: Bone marrow adipocytes drive the development of tissue invasive Ly6Chigh monocytes during obesity
Source: eLife journal article supplement (doi:10.7554/elife.65553), 2022-09-08
Supplement: supp [file elife-65553-supp-v1.zip › elife_poa_e65553_Figure_1_source_data_1.xlsx]

## Sheet: FIG 1A
Figure 1. Mice fed HFD increased body weight, fasting blood glucose, visceral and bone marrow adipose tissue.
Figure 1A-source data
Weeks	HFD 1	HFD 2	HFD 3	HFD 4	HFD 5	HFD 6	HFD 7	HFD 8	HFD 9	HFD 10	HFD 11	HFD 12	HFD 13	HFD 14	HFD 15	HFD 16	HFD 17	HFD 18	HFD 19	HFD 20	LFD 1	LFD 2	LFD 3	LFD 4	LFD 5	LFD 6	LFD 7	LFD 8	LFD 9	LFD 10	LFD 11	LFD 12	LFD 13	LFD 14	LFD 15	LFD 16	LFD 17	LFD 18
0	100	100	100	100	100	100	100	100	100	100	100	100	100	100	100	100	100	100	100	100	100	100	100	100	100	100	100	100	100	100	100	100	100	100	100	100	100	100
1.57	133.33	120.09	133.61	126.58	119.05	108.89	120.99	118.67	108.11	108.82	110.19	110.13	112.38	107.79	110.34	114.57	112.5	106.88	114.72	116.67		62.39	101.74	95.53	99.57	101.67	99.59	101.35	99.59	99.55	101.67	108.26	111.43	108.64	107.61	98.7	96.73	92.27
2	127.56	126.92	138.93	115.77	123.33	115.19	123.46	119.5		116.18	109.22	117.18	119.8	111.48	113.36	119.69	118.97	111.93	119.29	121.79		55.98	102.61	100.41	98.28	103.35	97.56	102.25	100	105	102.92	110.87	116.19	108.18	111.68	100.87	101.4	98.64
2.57	135.11	132.48	151.23	132.88	135.24	134.07	129.22	130.71		123.04	116.5	119.38	123.76	118.44	117.67	125.59	129.74	121.1	123.86	128.63		74.79	104.35	101.63	100.86	110.88	100.41	107.21	106.64	104.09	109.58	114.78	118.1	115	116.75	105.63	105.14	109.55
3	145.78	136.75	154.92	138.29	143.33	125.19	132.92	132.37		125.98	121.36	126.43	131.19	124.18	121.98	128.35	131.03	127.52	131.47	128.21			103.91	104.88	103.02	110.46	100.81	106.31	109.96	102.73	110	117.83	120.48	118.64	115.23	103.46	108.88	105
3.57	140.44	144.87	166.39	146.4	148.57	132.22	140.33	141.49		127.45	127.67	126.87	136.14	128.69	130.17	137.4	140.52	133.03	136.55	137.18			107.83	106.91	105.6	118.83	108.94	111.26	116.18	107.27	111.25	120.87	126.19	120	118.78	109.09	115.42	106.36
3.857	141.78	142.31		145.5	150.48	133.7				128.92	128.16	127.31	136.63	131.56		138.98		136.7		139.32				110.16	104.74	117.15			116.18	107.27	111.67	124.35	123.81	122.27		111.69		103.64
4.57	150.67	147.44		152.25	160	141.85				134.8	135.92	135.24	143.56	139.75		144.09		142.66		147.01				113.01	101.72	121.76			119.09	110.91	116.67	124.35	129.52	123.64		114.72		106.82
4.857	151.56	146.15		150.45	153.33	139.63				134.8	135.92	134.36	145.54	141.8		148.82		141.28		146.58				108.94	104.74	122.18			115.77	110.45	115.42	121.74	126.19	122.73		110.82		106.82
5.428	158.67	150.85		158.56	166.19	142.22				144.61	138.83	140.53	155.45	142.62		142.91		145.87		150.43				112.2	104.74	122.18			115.77	110.45	115.42	121.74	126.19	122.73		110.82		106.82
5.857	160.89	152.56		158.11	165.71	144.81				141.18	142.23	141.85	154.46	149.59		148.03		153.67		153.85				115.45	104.31	120.92			116.6	111.82	115.42	123.04	130	128.64		109.96		106.82
6.42	168.44	158.55		167.12	172.86	150				148.53	144.66	145.81	163.86	156.56		152.76		161.47		160.68				115.85	112.07	131.38			118.67	123.18	120.42	129.57	134.76	130.45		109.52		111.36
7	167.56	156.84		168.47	179.52	151.11				148.04	148.54	144.49	162.87	157.79		159.45		160.09		162.82				114.63	111.21	126.36			112.86	120	115.42	124.78	130.95	125.45		105.63		107.27
7.57	175.56	162.39		179.73	185.71	156.67				153.43	155.83	153.3	173.76	167.62		166.14		168.81		169.23				119.11	113.79	134.31			123.24	120.45	120.83	130.87	130.95	131.36		112.55		113.64
8	176	164.1		186.04	190	158.89				154.9	158.74	151.1	176.73	168.03		169.69		173.39		172.22				117.07	118.1	125.52			119.09	118.18	117.08	130.87	133.33	129.09		110.39		111.36
8.57	177.78	167.95		186.49	189.05	161.48				152.94	157.28	153.3	176.73	173.77		172.44		177.06		173.5				117.07	115.52	127.62			116.6	118.18	116.67	135.22	130	129.09		110.82		112.27
8.857	176.44					162.96				152.94		155.95	175.74			173.23				173.93						126.78			116.18	121.36		131.3	129.52			112.55
9.57	184					171.48				158.33		163.44	186.14			179.92				178.21						131.8			125.73	127.73		137.83	128.57			112.55
10	185.78					173.7				159.8		160.35	183.66			187.4				178.63						128.45			124.9	125.91		136.52	130.48			110.82
10.57	191.11					174.07				164.71		162.11	185.15			185.83				182.05						135.15			128.63	131.82		135.65	133.33			116.45
10.857	191.11					175.93				164.22		164.32	192.08			185.43				185.47						136.82			128.22	132.73		135.65	131.43			118.61
11.571	197.78					181.11				176.47		170.93	198.51			187.4				189.32						138.49			133.61	136.36		142.17	136.19			119.91
12	200.44					182.96				179.41		171.37	197.52			190.55				188.89						138.08			132.37	137.73		137.39	136.67			121.65
12.571	198.22					184.07				179.41		170.93	199.01			190.55				190.6						143.1			138.59	138.64		139.57	138.57			121.65
12.857	201.78					185.93				179.9		172.69	202.48			193.31				193.16						141.42			134.85	140.45		140.43	140.95			123.38
13.57	208					189.63				191.67		176.65	211.88			199.61				198.72						151.88			142.74	145		144.35	142.86			127.27
13.857	208					188.15				190.69		176.21	210.89			200				197.01						146.03			140.25	140.91		147.39	143.81			123.81
14.57	214.67					194.81				200		180.18	220.3			206.69				202.56						143.1			139.83	141.82		145.22	142.86			128.57
15	213.78					192.22				196.08		180.62	224.75			207.48				203.42						141.42			134.44	137.73		147.39	138.57			124.24
15.57	217.78					194.44				203.92		183.26	227.23							202.56						150.63			141.49	145.45		148.26	150.95			132.9
	216					196.67				202.94		184.58	224.26							202.99
16.57	216.44					198.52				207.35		190.75	228.22							194.87						157.32			147.72	152.73		155.22	156.19			139.83
16.857	214.67					198.15				206.37		187.67	225.25							207.26						153.97			146.47	150		150	146.67			137.66
17.428	213.33					197.04				216.67		201.76	214.36							211.11						159.41			147.3	154.55		155.22	155.71			142.86
17.857	216.44					197.78				209.8		196.04	231.19							211.11						153.97			150.21	155.45		143.91	151.43			140.69

## Sheet: FIG 1B
Figure 1B- source data
LFD 3 weeks	HFD 3 weeks	LFD 8 weeks	HFD 8 weeks	LFD 18 weeks	HFD 18 weeks
13.7	15.4	15.6	14.1	11.9	7.8
9.8	9.8	13.9	16.4	8.9	10.6
11.3	15.8	7.9	10.3	9.1	12.2
7.7	14.3		16.4	8.1	16.4
9.3	15.2	12.1	16.6	9.3	21.56
7.7	20.2	9	18.9	7.6	18.9
9.3	15.2	10.4	17.6	10.2	17.4
9.9	11.1	13.9	21.6	5.9	16.8
9.2	12.4		13.4	8.6	12.2
9.1	15.1		14.1	7.1	16.4
8.3	11.2		13.4	10.1	11.7
13.7				6.3	14.6
15.4				9.7	22
					17.7
					14.9
					21.2

## Sheet: FIG 1C
Figure 1C- source data
LFD 3 weeks	HFD 3 weeks	LFD 8 weeks	HFD 8 weeks	LFD 18 weeks	HFD 18 weeks
0.71	1.41	1.5	2.41	1.8	3.93
0.47	1.79	0.71	1.51	1.67	5.32
0.51	1.86	0.7	2.71	0.9	4.67
0.62	1.67	0.8	1.97	1.5	4.84

## Sheet: FIG 1D
Figure 1D- source data
LFD 3 weeks	HFD 3 weeks	LFD 8 weeks	HFD 8 weeks	LFD 18 weeks	HFD 18 weeks
50.9607	696.097	89.5961	433.56	282.288	770.638
21.297	159.643	55.1105	235.351	169.321	684.51
134.797	351.147	29.1633	344.945	204.195	644.258
93.8083	379.797	219.304	426.628	125.339	654.029
74.286	369.656	57.9298	222.87	86.3983	1126.04
	243.648		231.729	220.527	481.216

## Sheet: FIG 1E
Figure 1E- source data
LFD 3 weeks	HFD 3 weeks	LFD 8 weeks	HFD 8 weeks	LFD 18 weeks	HFD 18 weeks
9	34	9	8	74	105
18	13	16	68	47	165
31	42	5	107	78	101
11	40	27	89	77	130
38	91	35	73	71
37	26	24	56	75
23	14	33	56
	30	22	57
	43	15	130
	20	20	104
	46	32	100
	39	30	78
	41	50	122
	41	20	41
	35	30
	63	18
	22	51
		17
		15
		7
		40
		94
