# Supplementary material for: Bone marrow adipocytes drive the development of tissue invasive Ly6Chigh monocytes during obesity
Source: eLife journal article supplement (doi:10.7554/elife.65553), 2022-09-08
Supplement: supp [file elife-65553-supp-v1.zip › elife_poa_e65553_Figure_2_figure_supplement_2_source_data_1.xlsx]

## Sheet: Figure 2 –  Figure Suppl 2A-C
Figure 2 – figure supplement 2: Flow cytometry gating strategy for identification of Ly6Clow and Ly6Chigh monocytes and their progenitor cells
Figure 2 – Figure Supplement 2A-C: Flow Sorted Monocyte Progenitors and Stem Cells for 3, 8 and 18 weeks of LFD or HFD
LSK
3 wk Control (LFD)	3 wk HFD	8 wk Control (LFD)	8 wk HFD	18 wk Control (LFD)	18 wk HFD
0.00129	0.00047	0.00293	0.00378	0.00171	0.00255
0.00097	0.00231	0.00407	0.00269	0.00889	0.00134
0.000818	0.000237	0.00528	0.00281	0.00173	0.00539
0.000658	0.000643	0.00359	0.00347	0.00187	0.00219
0.00079	0.000378	0.00438	0.00353	0.00403	0.00326
0.000542	0.000761	0.00232	0.00324	0.00336	0.0027
0.00148	0.000402	0.00952	0.00316	0.00227	0.0036
HPC1
3 wk Control (LFD)	3 wk HFD	8 wk Control (LFD)	8 wk HFD	18 wk Control (LFD)	18 wk HFD
0.000895	0.000322	0.00179	0.00241	0.0011	0.00119
0.000584	0.00137	0.00278	0.00161	0.00569	0.000593
0.000414	0.000154	0.00355	0.00154	0.0012	0.00341
0.000381	0.00039	0.00203	0.00209	0.00103	0.00107
0.000543	0.00021	0.0026	0.00199	0.00219	0.00198
0.000373	0.000474	0.00141	0.00233	0.00145	0.00149
0.00106	0.000192	0.00549	0.00177	0.00151	0.00203
HPC2
3 wk Control (LFD)	3 wk HFD	8 wk Control (LFD)	8 wk HFD	18 wk Control (LFD)	18 wk HFD
129000000	54600000	111000000	138000000	121000000	50300000
190000000	84200000	175000000	103000000	292000000	10400000
278000000	10200000	260000000	119000000	63300000	119000000
90500000	2080000000	181000000	106000000	50400000	31300000
172000000	73600000	283000000	123000000	276000000	88300000
13200000	148000000	82300000	78100000	102000000	69300000
210000000	81500000	932000000	129000000	67300000	73300000
HSC
3 wk Control (LFD)	3 wk HFD	8 wk Control (LFD)	8 wk HFD	18 wk Control (LFD)	18 wk HFD
5.42e-05	3.09e-05	0.00034	0.000302	0.000141	0.000267
4.73e-05	0.000253	0.000219	0.000251	0.000691	0.0002
3.64e-05	1.19e-05	0.000292	0.000236	8.26e-05	0.000358
4.28e-05	2.94e-05	0.000266	0.000349	0.000234	0.000239
1.44e-05	1.5e-05	0.000313	0.000378	0.000484	0.00027
3.11e-05	4.61e-05	0.000322	0.000139	0.00056	0.000285
3.36e-05	8.46e-06	0.000444	0.00029	0.000166	0.00038
MPP
3 wk Control (LFD)	3 wk HFD	8 wk Control (LFD)	8 wk HFD	18 wk Control (LFD)	18 wk HFD
5.2e-05	2.57e-05	0.000298	0.000359	0.000313	0.000901
4.26e-05	0.000313	0.000307	0.000332	0.00148	0.000494
3.16e-05	1.19e-05	0.000396	0.000416	0.000248	0.000993
4.89e-05	4.62e-05	0.000402	0.000502	0.000456	0.000752
3e-05	3.17e-05	0.000347	0.000506	0.000874	0.00069
5.6e-05	7.15e-05	0.000254	7.79e-05	0.00101	0.000666
5.6e-05	2.75e-05	0.00028	0.000513	0.000331	0.00086
"LK" (aka LS(-)K )
3 wk Control (LFD)	3 wk HFD	8 wk Control (LFD)	8 wk HFD	18 wk Control (LFD)	18 wk HFD
0.00866	0.00309	0.0161	0.0263	0.0606	0.0668
0.00642	0.00733	0.0214	0.0191	0.078	0.0698
0.00461	0.00196	0.0345	0.0233	0.0616	0.0499
0.0042	0.00494	0.019	0.0232	0.0972	0.0663
0.0044	0.00319	0.0264	0.027	0.0844	0.0525
0.00282	0.00621	0.0199	0.0102	0.0925	0.089
0.00694	0.00304	0.0366	0.0263	0.0835	0.129
CMP
3 wk Control (LFD)	3 wk HFD	8 wk Control (LFD)	8 wk HFD	18 wk Control (LFD)	18 wk HFD
0.00166	0.000807	0.00437	0.00441	0.0605	0.0491
0.00125	0.00139	0.00554	0.00318	0.0284	0.0711
0.000965	0.000451	0.00895	0.00347	0.037	0.0393
0.00086	0.000956	0.0039	0.00416	0.0581	0.0787
0.000742	0.000655	0.00595	0.00357	0.028	0.0556
0.000523	0.00112	0.00331	0.00354	0.0745	0.0728
0.00155	0.000628	0.0175	0.00501	0.119	0.0632
GMP
3 wk Control (LFD)	3 wk HFD	8 wk Control (LFD)	8 wk HFD	18 wk Control (LFD)	18 wk HFD
0.00462	0.00141	0.0103	0.018	0.00448	0.00746
0.00322	0.0044	0.0128	0.014	0.0236	0.00445
0.00234	0.00057	0.0189	0.0173	0.00681	0.0174
0.00197	0.00162	0.0126	0.0143	0.00348	0.0128
0.00227	0.000863	0.0155	0.0212	0.0159	0.0201
0.00099	0.00271	0.0134	0.00537	0.00825	0.0133
0.00288	0.00102	0.00789	0.0165	0.00661	0.0117
MEP
3 wk Control (LFD)	3 wk HFD	8 wk Control (LFD)	8 wk HFD	18 wk Control (LFD)	18 wk HFD
0.00195	0.000833	0.00137	0.00377	0.00125	0.00328
0.00159	0.00155	0.00305	0.00194	0.0154	0.00157
0.00101	0.000914	0.00665	0.00261	0.00347	0.0048
0.00125	0.00223	0.00251	0.0046	0.00274	0.00419
0.00135	0.00158	0.00484	0.00224	0.00776	0.0067
0.0012	0.00229	0.0032	0.00123	0.0054	0.00468
0.00217	0.00126	0.0114	0.00474	0.00168	0.00682
