# Supplementary material for: Bone marrow adipocytes drive the development of tissue invasive Ly6Chigh monocytes during obesity
Source: eLife journal article supplement (doi:10.7554/elife.65553), 2022-09-08
Supplement: supp [file elife-65553-supp-v1.zip › elife_poa_e65553_Figure_2_source_data_1.xlsx]

## Sheet: FIG 2A
Figure 2. Bone marrow monocytes increased prior to adipose tissue macrophages
Figure 2A-source data: AT Monocytes Flow Cytometry
LFD 3 weeks	HFD 3 weeks	LFD 8 weeks	HFD 8 weeks	LFD 18 weeks	HFD 18 weeks
1.27	8.3	0.88	6.28	3.5	16.1
1.86	1.92	1.69	5.3	4.62	20.4
0.83	1.4	2.24	3.54	4.69	4.56
2.3	2.71	1.81	5.12	2	13.25
1.34	2.47	1.07	8.19	1.24	14.2
2.39	3.12	4.01	5.8	1.93	12.39
		4.57	5.53	3.25

## Sheet: FIG 2B
Figure 2B-source data: AT Macrophages Flow Cytometry
LFD 3 weeks	HFD 3 weeks	LFD 8 weeks	HFD 8 weeks	LFD 18 weeks	HFD 18 weeks
0.75	1.88	4.41	32.9	7.36	34.3
3.28	7.06	13.4	42.5	12.8	39
2.03	2.47	12.6	37.2	23.1	32.2
1.59	1.48	13.4	45	16	48.6
3.7	3.37	8.41	39.3	8.06	46.1
7.52	2.24	7.39	15.9	23.1	50
0.65	4.4	0.9	28.2	10.4	55

## Sheet: FIG 2C
Figure 2C-source data: Pro-inflammatory AT Macrophages Flow Cytometry
LFD 3 weeks	HFD 3 weeks	LFD 8 weeks	HFD 8 weeks	LFD 18 weeks	HFD 18 weeks
1.8	5.57	3.52	2.85	2.32	19.1
1.49	2.22	4.43	4.01	3.14	9.23
1.69	1.38	3.59	11.2	2.22	8.24
0.7	2.03	5.97	10.2	4	11.5
2.4	0.75	1.22	10.3	5.43	6.26
4.2	2.38	3.77	3.76	1.79	17.2
1.47		3.18	13.6	1.22	6.42
			14.1		7.25
					14.73
					18.9

## Sheet: FIG 2D
Figure 2D-source data: Itgam/cd11b Gene Expression
LFD 3 weeks	HFD 3 weeks	LFD 8 weeks	HFD 8 weeks	LFD 18 weeks	HFD 18 weeks
3.04988	7.43554	0.845804	11.9986	3.63917	7.18052
2.89097	6.50119	2.14474	6.38997	2.54058	9.9124
1.0495	3.23815	0.655659	12.1755	7.57799	21.8352
3.11477	3.44458	3.48959	5.31587	4.63192	12.8853
7.28629	4.14141		8.76852	4.82134	20.8364
					13.7107

## Sheet: FIG 2E
Figure 2E-source data: Adgre/ Emr1/F4/80 Gene Expression
LFD 3 weeks	HFD 3 weeks	LFD 8 weeks	HFD 8 weeks	LFD 18 weeks	HFD 18 weeks
1.36121	2.95884	0.306641	6.37651	1.45444	16.3844
1.12442	1.18352	2.03008	5.272	1.58167	14.8738
0.401798	1.04835	2.04393	4.11309	5.88574	17.0345
1.74421	2.36087	1.59596	3.67605	2.42137	10.9695
3.63875	1.77574	0.50923	4.37204	3.76935	20.0312

## Sheet: FIG 2F
Figure 2F-source data: Itgax/cd11c Gene Expression
LFD 3 weeks	HFD 3 weeks	LFD 8 weeks	HFD 8 weeks	LFD 18 weeks	HFD 18 weeks
0.257283	1.22798	0.386011	4.65608	0.480911	22.3688
0.209735	2.26532	0.408049	1.78696	0.282056	10.5246
0.203717	0.891625	1.07034	8.93318	0.713781	19.8423
0.323421	2.29035	0.359624	9.41406	0.416254	9.67777
0.508101	1.48174		2.49506		31.2033
					19.0681

## Sheet: FIG 2G
Figure 2G-source data: Timd4 Gene Expression
LFD 3 weeks	HFD 3 weeks	LFD 8 weeks	HFD 8 weeks	LFD 18 weeks	HFD 18 weeks
0.300525	0.224149	0.150721	0.203611	0.21101	0.824341
0.124245		0.133634	0.0286582	0.31101	0.443521
0.278457	0.178413	0.293601	0.0711757	0.122253	0.527671
	0.188856	0.000167065	0.247127		0.342075
0.12767	0.141543	0.125925		0.114812	0.500525
	0.472832	0.079299	0.0519399

## Sheet: FIG 2H
Figure 2H-source data: Marco Gene Expression
LFD 3 weeks	HFD 3 weeks	LFD 8 weeks	HFD 8 weeks	LFD 18 weeks	HFD 18 weeks
1.17566e-10	7.28537e-12	1.93654e-09	2.48456e-10	8.53958e-10	1.24115e-07
1.27536e-10		1.63654e-09	6.53192e-10		0.0127391
1.19556e-10	7.56171e-12	1.03654e-09	1.33128e-09	3.00365e-10	0.0117392
1.63537e-10	4.75085e-10	1.04754e-09		7.53958e-10	0.00232362
8.81735e-10	1.05189e-09			4.00365e-10	9.96805e-10
	9.80955e-10		3.97742e-10	2.00365e-10

## Sheet: FIG 2I
Figure 2I-source data: Bone Marrow Monocytes Flow Cytometry
LFD 3 weeks	HFD 3 weeks	LFD 8 weeks	HFD 8 weeks	LFD 18 weeks	HFD 18 weeks
23.9	28.53	20.74	20.78	18.87	37.86
21.63	27.53	20.72	27.09	28.83	28.68
22.6	29.91	20.54	28.25	12.84	41.09
20.75	27.56	21.31	30.15	18.35	37.17
22.71	26.88	20.72	24.68	23.02	20.37
22.48	29.36	21.96	30.11	22.95	27.78
23.88	28.96	15.29	20.42	24.62	36.84

## Sheet: FIG 2J 3 weeks
Figure 2J- source data: "3 weeks": Bone Marrow Monocyte Subsets Flow Cytometry
Ly6Clow 3L	Ly6Clow 3H	Ly6Chigh 3L	Ly6Chigh 3H
41.4	59.4	46.3	46.9
29.5	52.4	26.4	37.2
34.9	51.9	32.8	50
49.1	56.8	39.5	34.1
35.3	55.6	36.1	46.3
46.3	36.3	42.5	51.1
22.7	49.7	46.8	42.5

[truncated: 2 more sheets: FIG 2J 8 weeks, Fig 2J 18 weeks]
