# Supplementary material for: Bone marrow adipocytes drive the development of tissue invasive Ly6Chigh monocytes during obesity
Source: eLife journal article supplement (doi:10.7554/elife.65553), 2022-09-08
Supplement: supp [file elife-65553-supp-v1.zip › elife_poa_e65553_Figure_3_figure_supplement_1_source_data_1.xlsx]

## Sheet: Figure 3 – Figure Suppl 1A-C
Figure 3 – figure supplement 1. Monocyte progenitors and stem cells were not significantly altered with HFD in vivo
Figure 3 – Figure Supplement 1A-C source data: ELISA analysis of BM-cell Supernatant
(A) 3 weeks of Diet
TNF LFD	TNF HFD	IL1b LFD	IL1b HFD	IL-6 LFD	IL-6 HFD	Cxcl1 LFD	cxcl1 HFD	CCL2 LFD	CCL2 HFD
28.1145	102.059	94.0831	108.23	34.1564	139.348	147.354	463.286	25.3752	135.364
38.1732	7.27465	36.8724	4.47391	16.1391	24.18	137.982	64.222	19.1386	38.1366
38.3387	35.9048	29.6119	35.0416	95.7051	104.677	92.6246	232.461	5.34442	29.6822
55.9342	13.8076	63.4697	41.2896	48.5115	8.96459	554.881	329.568	55.0922	26.5552
45.575	23.0328	61.0322	38.1328	59.3929	28.2027	299.208	58.0261	123.293	31.9377
48.0819	47.1784	51.1572	57.6618	36.0166	65.825	904.764	141.854	43.4973	119.358
(B) 8 weeks of Diet
TNF LFD	TNF HFD	IL1b LFD	IL1b HFD	IL-6 LFD	IL-6 HFD	Cxcl1 LFD	cxcl1 HFD	CCL2 LFD	CCL2 HFD
49.0495	40.2858	99.9156	94.4781	62.8964	77.0167	357.253	738.865	6.28804	13.343
14.4084	3.12047	42.0866	20.2648	98.0335	20.9946	0	76.3796	1.93651	3.1583
4.90231	6.79475	40.4613	24.8665	37.9869	16.4278	249.153	118.545	3.89529	3.00367
34.6267	17.4589	61.0579	37.1517	12.9926	13.2563
17.123	39.1565	50.3479	73.6848	7.63656	0
3.67561	7.84205	17.7992	15.4647	2.21379	8.35924
(C) 18 weeks of Diet
TNF LFD	TNF HFD	IL1b LFD	IL1b HFD	IL-6 LFD	IL-6 HFD	Cxcl1 LFD	cxcl1 HFD	CCL2 LFD	CCL2 HFD
218.003	14.622	138.089	890.528	133.408	185.487	231.639	225.103	54.2197	21.6658
37.9418	0	203.91	310.505	23.6177	79.6181	96.1462	148.634	17.1799	43.8092
0	0	88.4918	187.343	17.6258	49.6256	78.8519	141.659	22.8049	38.4687
25.0934	43.9295	1204.34	490.331	31.5244	94.4798	279.641	115.022	82.1054	34.3337
36.2972	59.6498	507.645	556.827	118.341	200.968	124.759	160.237	30.1512	56.7443
109.769	5.78744	658.764	619.675	156.156	139.274	72.3879	117.234	21.6138	49.1394

## Sheet: Figure 3 – Figure Supplement 1D
Figure 3 – Figure Supplement 1D source data:TNF-alpha Gene Expression in Monocyte Subsets
3 weeks of Diet
Ly6Clow LFD	Ly6Clow HFD	Ly6Chigh LFD	Ly6Chigh HFD
1.32259	3.55781	1.05751	2.72679
1.56235	1.55949	1.04731	2.69883
2.8842	1.52127	1.9597	1.59529
8 weeks of Diet
Ly6Clow LFD	Ly6Clow HFD	Ly6Chigh LFD	Ly6Chigh HFD
1.18311	0.998492	1.38856	2.79737
1.10524	1.8065	3.54157	1.73999
1.74303	1.10273	1.30872	4.33863
18 weeks of Diet
Ly6Clow LFD	Ly6Clow HFD	Ly6Chigh LFD	Ly6Chigh HFD
1.08739	1.17356	1.07525	3.08938
3.2256	1.12942	1.08238	4.07955
1.13953	2.12217	1.17128	2.82097
