# Supplementary material for: Bone marrow adipocytes drive the development of tissue invasive Ly6Chigh monocytes during obesity
Source: eLife journal article supplement (doi:10.7554/elife.65553), 2022-09-08
Supplement: supp [file elife-65553-supp-v1.zip › elife_poa_e65553_Figure_3_source_data_1.xlsx]

## Sheet: FIG 3D
Figure 3. HFD blunted the mitochondrial oxidation of monocyte subsets.
Figure 3D-source data: OCR 3 weeks
Time (minutes)	HFD Ly6Chigh					HFD Ly6Clow					LFD LY6CLOW					LFD LY6Chigh
1.3507	20.427	20.5562	18.0168			10.0971	41.2368	20.6661			21.4808	25.5094	21.0098			15.0877	11.1299	45.7824
7.96799	19.3082	25.0541	29.9967			28.8033	21.2329	20.6611			21.3614	27.1021	18.8531			12.1564	40.769	20.8739
14.5905	20.8561	24.6464	26.6729			25.026	14.371	20.6349			21.1403	27.2147	19.8433			20.3891	36.7148	13.5946
21.292	9.40074	17.9847	19.0546			10.1359	17.315	18.8728			10.9982	7.32659	2.1871			12.0482	10.882	15.8066
27.8938	11.0766	13.9952	18.1076			10.201	17.2908	8.78036			12.26	2.78603	15.9982			1.91037	10.8197	10.9947
34.5028	10.776	14.0492	18.9775			10.202	11.5089	19.0008			10.1011	10.2442	6.82135			11.3213	10.7382	14.0097
41.1869	47.1744	42.4518	14.6294			40.0907	50.2258	46.9384			73.1418	81.5524	50.139			70.0045	60.8608	51.363
47.813	49.0968	43.9026	22.3939			31.0165	56.2884	45.116			78.0228	71.2199	52.7161			60.3829	50.4791	81.3481
54.4454	46.1237	42.1276	18.3789			56.0228	40.5904	47.5355			73.2288	91.0314	42.9051			60.32	64.3055	57.3201
61.1807	13.9461	8.93999	10.1867			10.1747	17.1617	10.9915			14.5531	11.6265	22.5397			12.1502	18.729	10.5043
67.8359	14.0192	9.25062	19.8489			21.2553	13.2136	10.8813			12.161	1.18412	22.1244			12.3828	10.9262	14.449
74.5213	10.8094	15.0107	13.7868			17.3831	18.4479	1.24397			10.8209	1.48103	26.9689			12.5264	10.0499	14.4547

## Sheet: FIG 3E
Figure 3E-source data: OCR 8 weeks
Time (minutes)	HFD Ly6Chigh			HFD Ly6Clow			LFD LY6CLOW			LFD LY6Chigh
1.3507	23.47	4.82413	15.0111	21.1658	11.7729	31.1839	26.7294	17.5869	40.0859	5.10048	21.3124	20.8338
7.96799	23.8757	9.56376	13.4107	21.3547	11.2412	36.1844	20.7854	17.5627	40.0553	8.45897	15.5969	21.1792
14.5905	26.0293	10.5956	12.9588	21.0623	11.5974	35.5958	20.1595	18.4099	30.8948	7.3527	10.4473	20.0153
21.292	3.57753	14.2136	13.9117	10.1512	11.0955	10.3113	20.8337	10.6211	5.44261	10.3538	10.3426	10.1955
27.8938	4.4116	12.9077	13.6353	11.0073	10.3261	10.383	21.2331	10.6062	5.40014	12.7379	10.2741	10.5253
34.5028	4.47826	10.2949	13.2738	11.0109	10.4324	10.2488	21.2391	9.25581	5.52588	12.8378	10.4245	10.4415
41.1869	26.0452	31.0653	21.5582	40.7527	40.0194	4.49091	86.6902	32.0554	92.6582	20.7805	60.5368	60.7893
47.813	25.9789	28.3087	19.8649	40.6358	40.104	30.0201	86.2355	28.7588	91.5671	30.5101	70.8865	60.8629
54.4454	26.0765	28.0297	19.0951	40.7342	40.0122	40.1726	89.2741	28.1581	91.3189	20.9595	60.6034	60.6499
61.1807	6.67159	9.53638	3.87138	12.0224	10.2904	11.4283	1.07142	7.21467	6.08185	10.1747	10.68	10.1489
67.8359	6.42656	10.5681	4.10776	21.285	10.62	11.9034	1.30381	8.10528	6.67466	10.2126	11.1359	11.8133
74.5213	6.45149	11.2047	4.65645	11.6384	11.9917	11.4655	2.35017	11.3161	7.63056	11.3831	11.4795	11.3967

## Sheet: FIG 3F
Figure 3F-source data: OCR 18 weeks
Time (minutes)	HFD Ly6Chigh					LFD Ly6Chigh					LFD LY6CLOW					HFD LY6Clow
1.3507	20.4662	13.5901	23.0085			15.7729	17.24	29.8525			55.7729	27.24	39.8524			10.2503	29.8213	15.0313
7.96799	29.3705	12.0009	21.2847			16.197	16.2199	58.9853			56.197	26.2199	38.9853			10.5804	28.6917	13.6144
14.5905	29.4306	11.5697	29.6808			15.6446	16.8119	39.4494			55.6446	16.8119	39.4494			11.2879	28.2926	14.0157
21.292	5.87283	5.70548	8.28861			3.87291	3.2197	7.16383			13.8729	3.2197	17.1638			7.9062	5.85672	7.98813
27.8938	7.07764	6.37519	6.08376			3.59843	3.88661	6.50891			13.5984	3.88661	16.5089			7.09751	6.05823	8.45612
34.5028	7.11552	6.40384	7.88258			4.62341	3.8409	8.05315			14.6234	3.8409	18.0531			6.27545	6.45347	8.74278
41.1869	46.3539	58.475	37.7902			34.6309	66.7296	57.4273			94.6309	66.7296	97.4273			54.3535	87.9746	40.8948
47.813	48.1055	48.2073	59.2167			54.7326	76.9203	68.1556			94.7326	76.9203	98.1556			58.2591	87.7435	41.527
54.4454	47.6166	29.4726	49.3494			24.7843	36.2125	88.4585			94.7843	76.2125	98.4585			64.2349	87.6734	32.0928
61.1807	5.70129	5.66485	7.61747	3.85161	2.2553	3.66102	4.09135	6.85378			13.661	4.09135	6.85378			20.5975	5.82345	16.5432
67.8359	5.51827	5.48342	8.19409	4.96215	1.86614	3.48496	3.86967	5.33985			13.485	3.86967	5.33985			21.8509	5.19581	16.9647
74.5213	6.04773	4.78361	7.48221	4.0872	2.30215	3.05713	3.77489	5.62585			13.0571	3.77489	5.62585			21.349	6.07889	15.4876

## Sheet: FIG 3G
Figure 3G-source data: OCR AUC 3 weeks diet
LFD Ly6Clow	HFD Ly6Clow	LFD Ly6Chigh	HFD Ly6Chigh
2283	1909	1708	1712
2294	2168	1922	1730
1951	2130	1732	1424

## Sheet: FIG 3H
Figure 3H-source data: OCR AUC 8 weeks diet
LFD Ly6Clow	HFD Ly6Clow	LFD Ly6Chigh	HFD Ly6Chigh
2549	1015	1639	1121
1932	1911	1381	1152
2657	1947	1477	967.3

## Sheet: FIG 3I
Figure 3I-source data: OCR AUC 18 weeks diet
LFD Ly6Clow	HFD Ly6Clow	LFD Ly6Chigh	HFD Ly6Chigh
3323	1853	1161	1632
2978	2446	1611	1320
3053	1438	2422	1667

## Sheet: FIG 3J
Figure 3J-source data: FACS-Sorted Monocyte ECAR AUC

## Sheet: FIG 3K
Figure 3K-source data: BM Lactate
LFD 3 weeks	HFD 3 weeks	LFD 8 weeks	HFD 8 weeks	LFD 18 weeks	HFD 18 weeks
0.7	1.2	0.4	1.2	0.9
0.7	0.8	0.1	0.5	0.8	2.3
0.9	3.3	0.6		0.7	1.1
0.4	3	0.4	0.7	0.6	1.2
1	0.9	0.2	0.4	0.4	0.8
0.9	1.9		0.8	0.8
0.4		0.3		1	2.2
0.9	1.3	0.2	0.6	0.9	1.2
		0.9	0.7		1.8
