# Supplementary material for: Bone marrow adipocytes drive the development of tissue invasive Ly6Chigh monocytes during obesity
Source: eLife journal article supplement (doi:10.7554/elife.65553), 2022-09-08
Supplement: supp [file elife-65553-supp-v1.zip › elife_poa_e65553_Figure_4_source_data_1.xlsx]

## Sheet: FIG 4A
Figure 4. HFD downregulated expression of mitochondrial fusion genes and upregulated mitochondrial fission genes
Figure 4A- source data: 3 week diet Mito Fusion Gene Expression
	LFD			HFD
Mfn1	0.0870444	0.0790219	0.0976109	0.111856	0.288988	0.103953
Mfn2	0.507442	0.47736	0.489647	0.528364	0.471954	0.415192
Opa1	0.0777533	0.0942286	0.0927642	0.0552796	0.121452	0.11495
Tomm20	0.0770247	0.0767889	0.115168	0.52222	0.111777	0.761436
Tomm40	0.607375	0.751125	0.820735	0.582226	0.112318	0.254672

## Sheet: FIG 4B
Figure 4B- source data: 8 week diet Mito Fusion Gene Expression
	LFD				HFD
Mfn1	0.523499	0.226142	0.637799	0.552252	0.0741717	0.0446809	0.0793467	0.05518
Mfn2	0.510344	0.476063	0.509861		0.0391097	0.0462551	0.0428602
Opa1	0.779334	0.251038	0.064406	0.667446	0.0811464	0.0444883	0.0855951
Tomm20	0.875347	0.281589	0.882363	0.698658	0.0706675	0.045424	0.138969	0.985374
Tomm40	0.10191	0.321066	0.131461	0.112883	0.919806	0.447948	0.188012

## Sheet: FIG 4C
Figure 4C- source data: 18 week diet Mito Fusion Gene Expression
	LFD			HFD
Mfn1	3.57966	0.808764	0.916549	0.89981	0.104669	0.788523
Mfn2	1.62772	1.50285	1.50937	0.465485	0.447769	0.473786
Opa1	1.25131	1.04904	1.16292	0.101342	0.123562	0.114079
Tomm20	1.23744	0.973551	0.974899	0.10866	0.107187	0.103904
Tomm40	1.49799	0.966838	0.835447	0.901249	0.83836	0.102509

## Sheet: FIG 4D
Figure 4D- source data: 3 week diet Mito Fission Gene Expression
	LFD			HFD
Drp1	0.68469	0.657854	0.582607	2.65563	3.88038	2.61429
CypD	0.445432	0.470969	0.6833	0.266687	0.52263	0.36994
Fis1	0.292529	0.423501	0.441986	0.547866	0.622812	0.387878

## Sheet: FIG 4E
Figure 4E- source data: 8 week diet Mito Fission Gene Expression
	LFD				HFD
Drp1	0.894892	0.62277	0.833165	0.63126	5.97909	7.99285	8.11883
CypD		0.141602	2.24211	0.39015	5.97465	5.05365	4.70233
Fis1	1.65403	1.45457	3.03826	2.44358	2.83922	2.33906	4.59718	3.95234

## Sheet: FIG 4F
Figure 4F- source data: 18 week diet Mito Fission Gene Expression
	LFD			HFD
Drp1	0.128015	0.913315	0.729649	7.04057	9.19958	6.92338
CypD	0.730172	0.419077	0.500927	6.1699	7.0605	6.27842
Fis1	0.505835	0.447957	0.403663	5.05048	5.16402	3.8852

## Sheet: FIG 4G
Figure 4G- source data: BM Cellular abundance versus Mfn2 gene expression
Mfn2	Ly6Clow	Ly6Chigh
0.491483	37.03	38.63
0.498756	55.29	32.79
0.524997	82.39	12.5
0.471836	51.73	44.01
0.427417	41.2	49.55
0.461347	30.1	64.14

## Sheet: FIG 4H
Figure 4H- source data: BM Cellular abundance versus Drp1 gene expression
Drp1	Ly6Clow	Ly6Chigh
0.641717	37.03	38.63
0.745522	55.29	32.79
0.590326	82.39	12.5
3.0501	51.73	44.01
7.36359	41.2	49.55
7.72118	30.1	64.14
