# Supplementary material for: Bone marrow adipocytes drive the development of tissue invasive Ly6Chigh monocytes during obesity
Source: eLife journal article supplement (doi:10.7554/elife.65553), 2022-09-08
Supplement: supp [file elife-65553-supp-v1.zip › elife_poa_e65553_Figure_5_figure_supplement_1_source_data_1.xlsx]

## Sheet: Figure 5 – Figure Suppl 1A-C
Figure 5 – figure supplement 1- source data: BMA precursor cell markers change with HFD and phenotyping WATA and BATA
Figure 5 – Figure Supplement 1A-C- source data: Gene Expression of Pre-adipocyte markers in Bone Marrow Cells
3 Weeks of Diet
HOXC8 LFD	HOXC8 HFD	HOXC9 LFD	HOXC9 HFD	TMEM26 LFD	TMEM26 HFD
0.255932	0.171427	0.203674	0.100563	0.279193	0.132601
0.112422	0.411843	0.110606	0.263827	0.351477	0.41399
0.233501	0.191423	0.138552	0.226147	0.161209	0.379806
8 weeks of Diet
HOXC8 LFD	HOXC8 HFD	HOXC9 LFD	HOXC9 HFD	TMEM26 LFD	TMEM26 HFD
0.260143	0.68052	0.233115	0.100563	0.086787	0.0159274
0.238049	0.432248	0.189982	0.263827	0.162777	0.0622221
0.3081	0.552898	0.12574	0.226147	0.0163804	0.067453
18 weeks of Diet
HOXC8 LFD	HOXC8 HFD	HOXC9 LFD	HOXC9 HFD	TMEM26 LFD	TMEM26 HFD
0.260143	0.68052	0.233115	0.100563	0.086787	0.0159274
0.238049	0.432248	0.189982	0.263827	0.162777	0.0622221
0.3081	0.552898	0.12574	0.226147	0.0163804	0.067453

## Sheet: Figure 5 – Figure Supplement 1D
Figure 5 – Figure Supplement 1D- source data: Gene Expression of classical white and brown adipocyte markers in WATA and BATA
WATA
Asc1	Leptin	Ucp1	P2rx5		White Marker
0.11035	0.347689	0.0016326	0		Asc1
0.0693146	0.549398	0.00118276	0		Leptin
BATA
Asc1	Leptin	Ucp1	P2rx5		Brown Marker
0		1.00063	0.421304		Ucp1
0	0.0262996	1.33996	0.0543577		P2rx5
0		1.524	0.0775035
