# Supplementary material for: Bone marrow adipocytes drive the development of tissue invasive Ly6Chigh monocytes during obesity
Source: eLife journal article supplement (doi:10.7554/elife.65553), 2022-09-08
Supplement: supp [file elife-65553-supp-v1.zip › elife_poa_e65553_Figure_5_source_data_1.xlsx]

## Sheet: FIG 5A
Figure 5. Bone marrow adipocyte whitening detected at 8 and 18 weeks of HFD favours increased bone marrow Ly6Chigh monocytes and induced changes in mitochondrial dynamic gene expression
Figure 5A- source data: 3 week diet Volcano Plot
3 week diet Volcano Plot
ASC1	0.705761	0.016976
Leptin	0.86216	0.774946
Adiponectin	1.04395	0.768885
UCP1	0.938572	0.692385
PAT2	0.951469	0.867358
P2RX5	1.8712	0.318344
Original Data
	LFD										HFD
ASC1	1.15963	1.15963	1.2832	1.15963	0.321757	1.15963	0.313675	1.15963	1.2832		1.18262	1.18262	1.77348	1.18262	1.77348	1.18262	1.22389	1.77348	1.18262	1.71169
Leptin	0.661389	0.561389	1.33861								0.243507	1.56892	0.579851	1.56892
Adiponectin	0.801158	1.23141	0.967433								1.0202	0.8653	0.988208
UCP1	1.05141	1.20397	0.744618								1.2079	1.02638	0.962068
PAT2	0.870224	0.961296	1.16848								0.722014	1.59198	0.839023
P2RX5	0.283134	1.6286	1.08827								0.732522	0.318905	0.551821

## Sheet: FIG 5B
Figure 5B- source data: 8 week diet Volcano Plot
ASC1	0.566589	0.018123
Leptin	0.231351	0.28955
Adiponectin	0.538438	0.165106
UCP1	2.33307	0.016603
PAT2	0.629554	0.152461
P2RX5	3.09754	0.011265
Original Data
	LFD										HFD
ASC1	1.15294	0.847059	1.17221	0.681	1.14093	0.847059	0.181109	0.7346			1.06932	0.77341	1.06932	1.53919	2.59873	0.875283	1.06932	1.77449	1.83403	2.3039
Leptin	0.124892	1.48685	0.0118419	0.201423	0.218251	0.956746					0.171855	0.0707928	0.0692868	1.63359	0.163523	9.87767	3.14177
Adiponectin	1.37419	0.679437	0.790081	1.42406	0.81767	0.707177	0.342879	1.8645			1.90609	2.37141	1.04845	1.01105	0.846617	0.922452	1.09166	5.85722	1.66009
UCP1	0.53373	0.534673	1.04434	1.42146	1.04434	1.42146					0.74362	0.902051	0.502754	0.54626	0.122695	0.0894965	0.0934641
PAT2	1.45399	0.216882	1.32913	0.69274	0.51092						1.7523	0.732141	1.69004	1.52093	0.981788
P2RX5	0.816791	1.27017	0.913035								0.204776	0.426794	0.33694

## Sheet: FIG 5C
Figure 5C- source data: 18 week diet Volcano Plot
	fold change	P-value
ASC1	0.356557	6e-06
Leptin	0.401963	0.0005
Adiponectin	0.658705	0.082579
UCP1	11.5244	0.001945
PAT2	2.44371	0.014743
P2RX5	4.26569	0.011394
Original Data
	LFD										HFD
ASC1	0.645029	0.645029	0.578264	0.645029	0.578264	1.99926	1.3316	1.99926	0.578264		2.82616	2.82616	3.22512	2.82616	3.22512	2.82616	1.43527	2.82616	3.22512
Leptin	0.920364	1.11825	0.920364	1.11825							2.5303	2.90641	2.17075
Adiponectin	0.929235	1.39151	0.679255								1.59821	1.60588	1.3503
UCP1	1.19317	1.04349	0.763336								0.0665687	0.0963389	0.0974092
PAT2	1.99883	1.79569	1.20548								0.642597	0.737202	0.666266
P2RX5	0.985281	1.47238	1.74233								0.446741	0.136247	0.401612

## Sheet: FIG 5D
Figure 5D- source data: BM Cellular Abundance versus BM ASC1 Gene Expression
ASC1	Ly6Clow	Ly6Chigh
0.001619	37.03	38.63
0.001308	55.29	32.79
0.0008987	82.39	12.5
0.002293	51.73	44.01
0.001806	41.2	49.55
0.002397	30.1	64.14

## Sheet: FIG 5E
Figure 5E- source data: BM Cellular Abundance versus BM UCP1 Gene Expression
UCP1	Ly6Clow	Ly6Chigh
0.001089	37.03	38.63
0.001061	55.29	32.79
0.001238	82.39	12.5
0.00116	51.73	44.01
0.0004546	41.2	49.55
0.0001074	30.1	64.14

## Sheet: FIG 5F
Figure 5F- source data: BM Monocyte Subset % treated with BMA from 3 week diet mice
3w LFD BMA Ly6Clow	3w LFD BMA Ly6Chigh	3w HFD BMA Ly6Clow	3w HFD BMA Ly6Chigh
36.8	52	49.4	43.2
56.7	34.12	55	35.8
49.8	39.1	55.1	37.7

## Sheet: FIG 5G
Figure 5G- source data: BM Monocyte Subset % treated with BMA from 8 week diet mice
8w LFD BMA Ly6Clow	8w LFD BMA Ly6Chigh	8w HFD BMA Ly6Clow	8w HFD BMA Ly6Chigh
33.6	54.2	42.1	50.7
56.7	38.4	43.1	52.1
55.1	38.9	41.1	54.1
50.72	39.89	39.05	56.2

## Sheet: FIG 5H
Figure 5H- source data: BM Monocyte Subset % treated with BMA from 18 week diet mice
18w LFD BMA Ly6Clow	18w LFD BMA Ly6Chigh	18w HFD BMA Ly6Clow	18w HFD BMA Ly6Chigh
51.8	42.6	47.2	47.2
50.2	40.3	50.9	41.5
56.4	38.5	37.5	56.2
52.4	43	48	52.5

## Sheet: FIG 5I
Figure 5I- source data: Mito Fusion Gene Expression in BM Monocytes treated with BMA from 18 week diet mice
	LFD				HFD
Mfn1	3.4532	0.730475	0.691737		0.178202	0.207351	0.167243
Mfn2	0.377161	0.499835	0.407929	0.39904	0.368383	0.29807	0.359382	0.331771
Opa1	4.27059	1.13662	0.834522		0.423	2.77238	1.8015
Tomm20	3.36721	3.39646	4.99839		1.44075	2.19268	1.06993
Tomm40	3.90896	4.26658	3.80523		0.437149	0.316127	0.715738

## Sheet: FIG 5J
Figure 5J- source data: Mito Fission Gene Expression in BM Monocytes treated with BMA from 18 week diet mice
	LFD				HFD
Drp1	3.1985	1.80472	2.10284		9.95517	6.20924	6.26246
CypD	1.42755	1.49808	1.03245		5.50594	3.13902	6.09992
Fis1	1.38993	2.23851	3.23976		5.52112	2.27511	2.95664
