# Supplementary material for: Bone marrow adipocytes drive the development of tissue invasive Ly6Chigh monocytes during obesity
Source: eLife journal article supplement (doi:10.7554/elife.65553), 2022-09-08
Supplement: supp [file elife-65553-supp-v1.zip › elife_poa_e65553_Figure_6_source_data_1.xlsx]

## Sheet: FIG 6B
Figure 6. Bona fide white adipocytes favoured Ly6Chigh monocytes preponderance, blunted monocyte mitochondrial membrane potential, and induced mitochondrial fragmentation in vitro
Figure 6B- source data: Percent Monocyte Subsets
	Ly6Clow					Ly6Chigh
Media	30.1	42.4	47.5			51.8	45.3	43.3	42.9	43.2
WATA CM	33.2	24.9	34.9	36.4	27.7	53.2	52.9	55.4	57.2	61.8
BATA CM	46.1	49.4	72.4	53.3	51.4	31.6	25.9	21.7	33.5	37.7

## Sheet: FIG 6D
Figure 6D- source data: Mito Fusion Gene Expression in BM monocytes treated with conditioned medium
	Media						WATA-CM					BATA-CM
Mfn1	2.97156	1.09465	1.89095	1.4548	1.96655	1.78018	0.671556	1.09465	0.570955		1.25242	1.42115	1.6119	5.78018		3.42713
Mfn2	2.34118	1.51872	0.851266	1.55018	1.51344	0.966434	0.341182	0.518724	0.385127	0.37256	0.335732	1.53797	1.55018	1.51344	0.496643	4.57339
Opa1	2.26872	1.6543	1.33322	0.49449	2.253		1.36205	0.436584	2.63425		0.0157639	4.0565	2.88863	1.58058		1.35172
Tomm20	1.3022	1.43019	3.14452	1.42241	0.392197	1.55572	0.263286	0.444847	0.826129		0.319702	1.18756	3.6691	4.89342		1.47273
Tomm40	1.127	1.50009	1.77561	1.56961	2.87136	2.17103	1.72686	0.442571	0.631637		0.541413	1.8942	3.26968	7.99151		0.613569

## Sheet: FIG 6E
Figure 6E- source data: Mito Fission Gene Expression in BM monocytes treated with conditioned medium
	Media								WATA-CM								BATA-CM
Drp1	2.29277	1.7375	2.12446	1.96766	1.56762	3.09329			2.76292	2.92738	4.12928	3.662	5.76264	11.0429	7.94617	9.55833	1.64997	0.156762	0.00497944	0.861824	3.95404	0.519766
CypD	3.78829	3.59359	2.17726	1.9633	4.9797	1.99575			4.71989	9.33586	8.13487	5.94557	6.14567	8.14429			0.633039	0.979701	0.995753	2.10352	2.90882	1.11092
Fis1	1.14	1.90812	2.28771	1.27602	2.7793	1.69889			1.62601	3.90812	3.95428	3.99549	1.10899	3.73909	3.62278		1.86021	1.93038	0.698888	1.62601	0.390812	0.395428

## Sheet: FIG 6H
Figure 6H- source data: Quantification of the percentage of monocytes with the indicated mitochondrial morphology
Conditional media	N	Total # of cells analyzed	# of Fragmented	# of Intermediate	# of Tubulated	Fragmented ratio (%)	Intermediate ratio (%)	Tubulated ratio (%)
Control	1	65	16	39	10	24.6154	60	15.3846
Control	2	51	8	31	12	15.69	60.78	23.53
Control	3	51	13	28	10	25.49	54.9	19.61
WATA-CM	1	45	27	15	3	60	33.3333	6.66667
WATA-CM	2	40	29	10	1	72.5	25	2.5
WATA-CM	3	83	51	27	5	61.45	32.53	6.02
BATA-CM	1	74	6	23	45	8.10811	31.0811	60.8108
BATA-CM	2	51	9	15	27	17.65	29.41	52.94
BATA-CM	3	35	6	11	18	17.14	31.43	51.43
