# Supplementary material for: Bone marrow adipocytes drive the development of tissue invasive Ly6Chigh monocytes during obesity
Source: eLife journal article supplement (doi:10.7554/elife.65553), 2022-09-08
Supplement: supp [file elife-65553-supp-v1.zip › elife_poa_e65553_Figure_7_figure_supplement_1_source_data_1.xlsx]

## Sheet: Figure 7-Figure Suppl 1A-C
Figure 7 – figure supplement 1- source data: HSC and their progenitors following the white and brown CM treatment for 18 h
Figure 7 – figure supplement 1A-C- source data: Quantified Stem and Progenitor cells for column graphs
"Percent of Single Cells"
(A) CD117 (+)
Media	WATA CM	BATA CM
5.03	6.73	4.23
3.19	4.92	2.93
5.09	5.75	6.4
(B) CD117 (+), Sca1 (+)
Media	WATA CM	BATA CM
0.03521	0.059897	0.032148
0.021692	0.0369	0.011134
0.007635	0.051175	0.06592
(B) CD117 (+), Sca1 (-)
Media	WATA CM	BATA CM
2.79668	4.42834	2.59722
1.45783	3.16848	1.69354
3.14053	3.74325	4.4416
(C) CMP
Media	WATA CM	BATA CM
1.34241	1.69605	1.309
0.711421	1.33076	0.660481
1.36927	1.83419	1.69669
(C) GMP
Media	WATA CM	BATA CM
0.357975	0.88124	0.361014
0.193891	0.583	0.299757
0.471079	0.527798	0.901645
