# Supplementary material for: Bone marrow adipocytes drive the development of tissue invasive Ly6Chigh monocytes during obesity
Source: eLife journal article supplement (doi:10.7554/elife.65553), 2022-09-08
Supplement: supp [file elife-65553-supp-v1.zip › elife_poa_e65553_Figure_7_source_data_1.xlsx]

## Sheet: FIG 7B
Figure 7. Brown adipocytes favour Ly6Clow monocytes through progenitor cell differentiation and proliferation
Figure 7B- source data: BrdU percent incorporation in Ly6clow BM monocytes
Media BrdU	WATA	WATA BrdU	BATA	BATA BrdU
1.83	1.14	2.26	0.65	25.9
2.68	1.25	1.5	1.52	30.1
2.1	1.3	2.49	0.77	23.11

## Sheet: FIG 7C
Figure 7C- source data: Colony Forming Assay: Effect of CM on growth of BM cell stem colony type
	BFU-E			CFU-GEMM			CFU-G			CFU-M
	Mouse 1	Mouse 2	Mouse 3	Mouse 1	Mouse 2	Mouse 3	Mouse 1	Mouse 2	Mouse 3	Mouse 1	Mouse 2	Mouse 3
Media	5.2	4.4	3.8	1.2	2.8	1.8	8.7	6.7	6	8.5	7.6	9
WATA	5.7	3.8	3.7	3.2	2.8	2	6.5	9.6	7.7	10.3	8.4	8.2
BATA	4.7	3.8	3.3	4.2	5.3	4.3	4.8	5.2	3.8	11.7	10.3	11.8

## Sheet: FIG 7D
Figure 7D- source data: Colony Forming Assay: Effect of CM on growth of BM cell stem colony number
MEDIA	WATA CM	BATA CM
21.33	24	25.67
21	23.5	23
20.67	19.33	20
25.67	27.33	25
22.5	24.5	26
20.67	23.67	26.67

## Sheet: FIG 7E
Figure 7E- source data: Percent of GMP progenitors in Ly6c monocyte subsets
Ly6C- Low	Ly6c- High
11.7045	0.5967
16.3366	0.9368
13.7896	0.7807
