# Supplementary material for: Bone marrow adipocytes drive the development of tissue invasive Ly6Chigh monocytes during obesity
Source: eLife journal article supplement (doi:10.7554/elife.65553), 2022-09-08
Supplement: supp [file elife-65553-supp-v1.zip › elife_poa_e65553_Figure_8_source_data_1.xlsx]

## Sheet: FIG 8D
Figure 8. WATA-CM promotes Ly6Clow towards Ly6Chigh shift in BM-derived monocytes
Figure 8D source data: Monocyte Subset Percent in Media
	Ly6Clow			Ly6Chigh
Sorted Ly6Clow	91.2	93.6	94.2	8.81	6.1	5.2
Sorted Ly6Chigh	0.15	1.8	3.7	99.9	98.5	96.98

## Sheet: FIG 8E
Figure 8E source data: Monocyte Subset Percent in WATA CM
	Ly6Clow			Ly6Chigh
Sorted Ly6Clow	50.3	49	51.5	49.7	50	47.8
Sorted Ly6Chigh	0.68	5	3.4	99.3	94.8	95.8

## Sheet: FIG 8F
Figure 8F source data: Monocyte Subset Percent in BATA CM
	Ly6Clow			Ly6Chigh
Sorted Ly6Clow	83.7	91.9	94.8	16.3	7	4.9
Sorted Ly6Chigh	0.4	0.98	3	99.6	97	98.9
