# Supplementary figures and images for: Bone marrow adipocytes drive the development of tissue invasive Ly6Chigh monocytes during obesity
Source: eLife journal article supplement (doi:10.7554/elife.65553), 2022-09-08

Figure 2-figure supplement 1

A

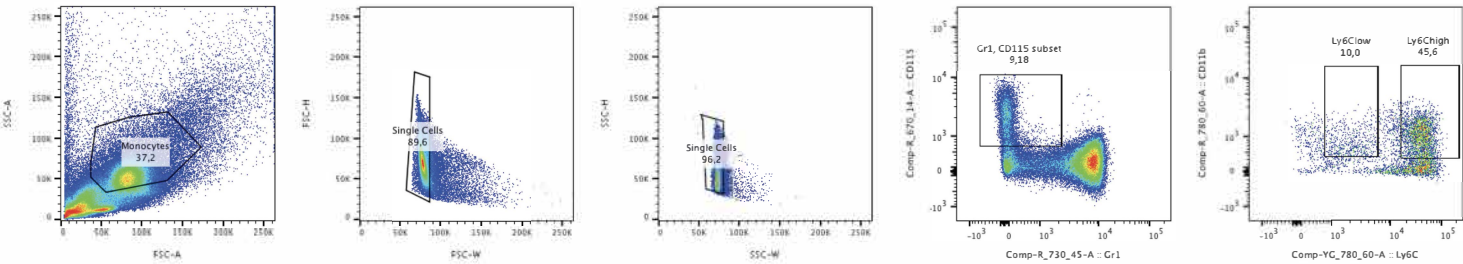

B

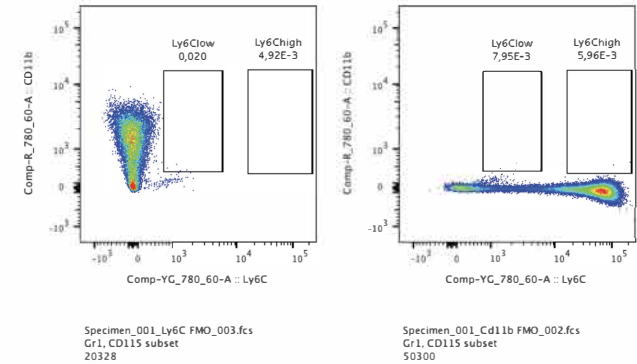

C

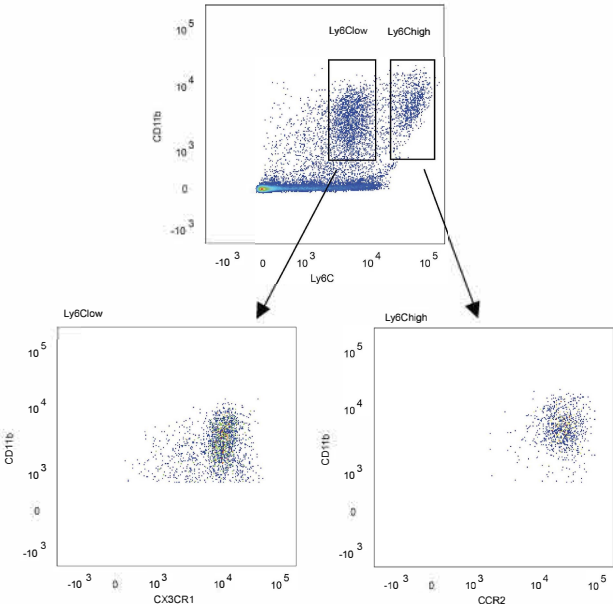

D

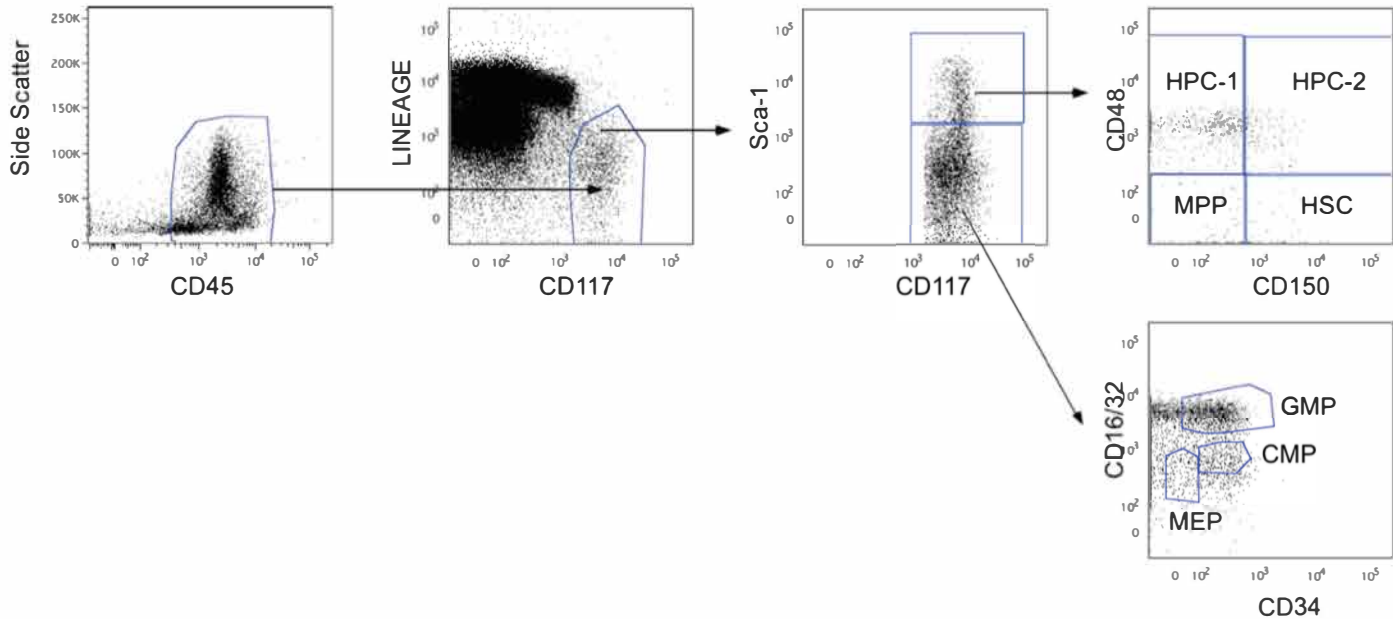

Supplement: supp [file elife-65553-supp-v1.zip]

**Figure 5-figure supplement 1**

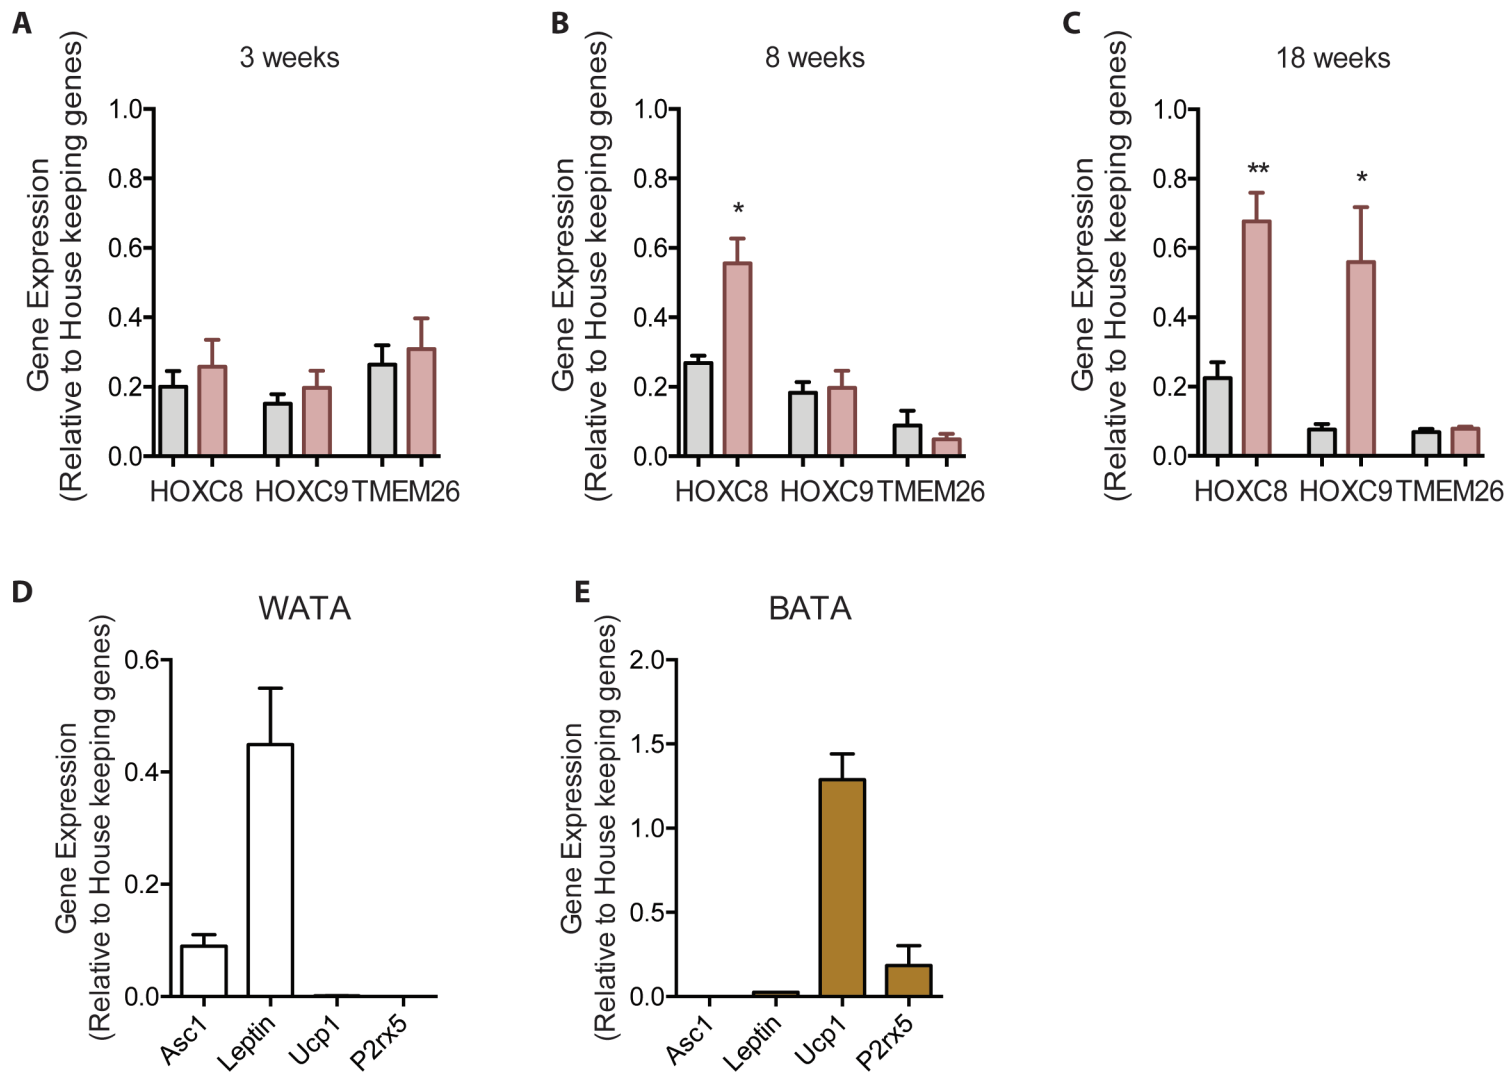

Supplement: supp [file elife-65553-supp-v1.zip]

Figure 2-figure supplement 2

A 3 weeks

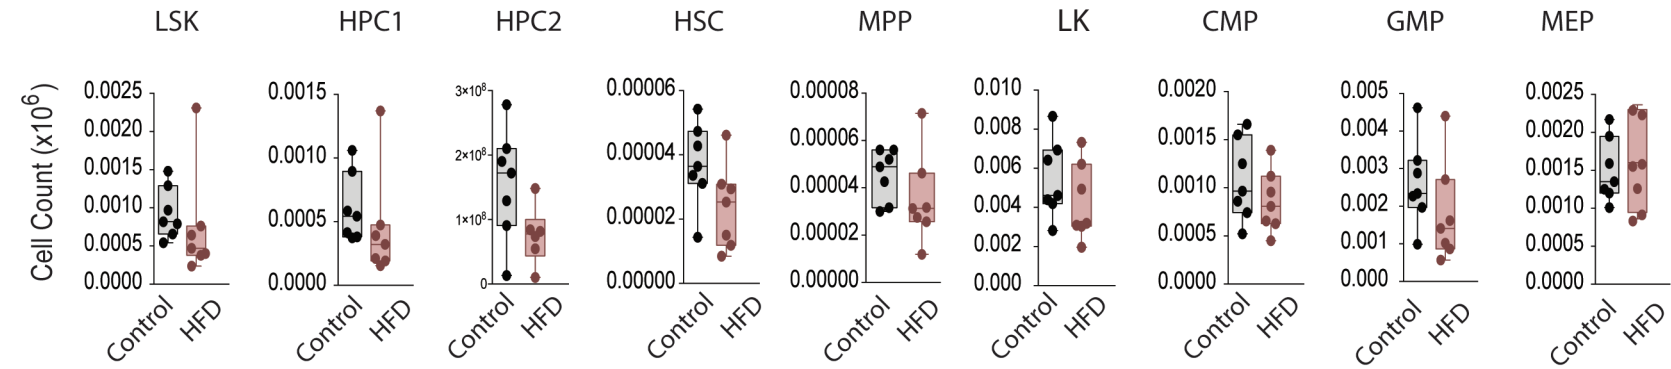

B 8 weeks

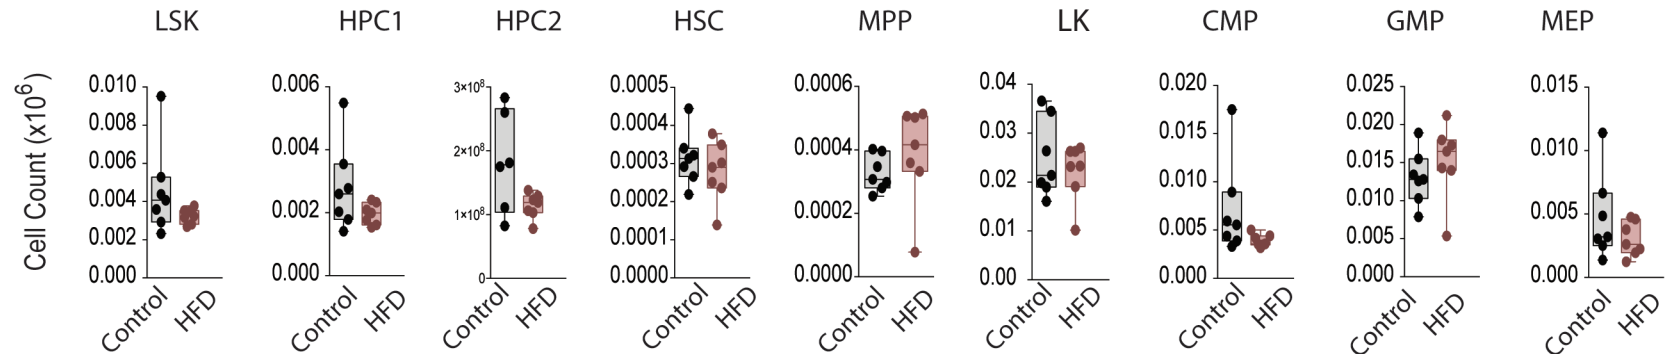

C 18 weeks

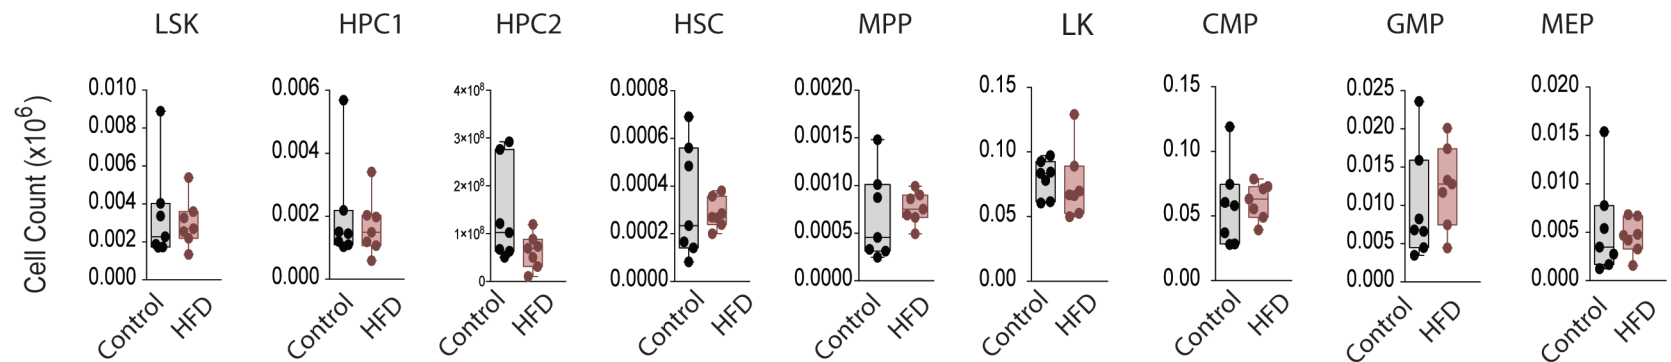

Supplement: supp [file elife-65553-supp-v1.zip]

**Figure 3-figure supplement 1**

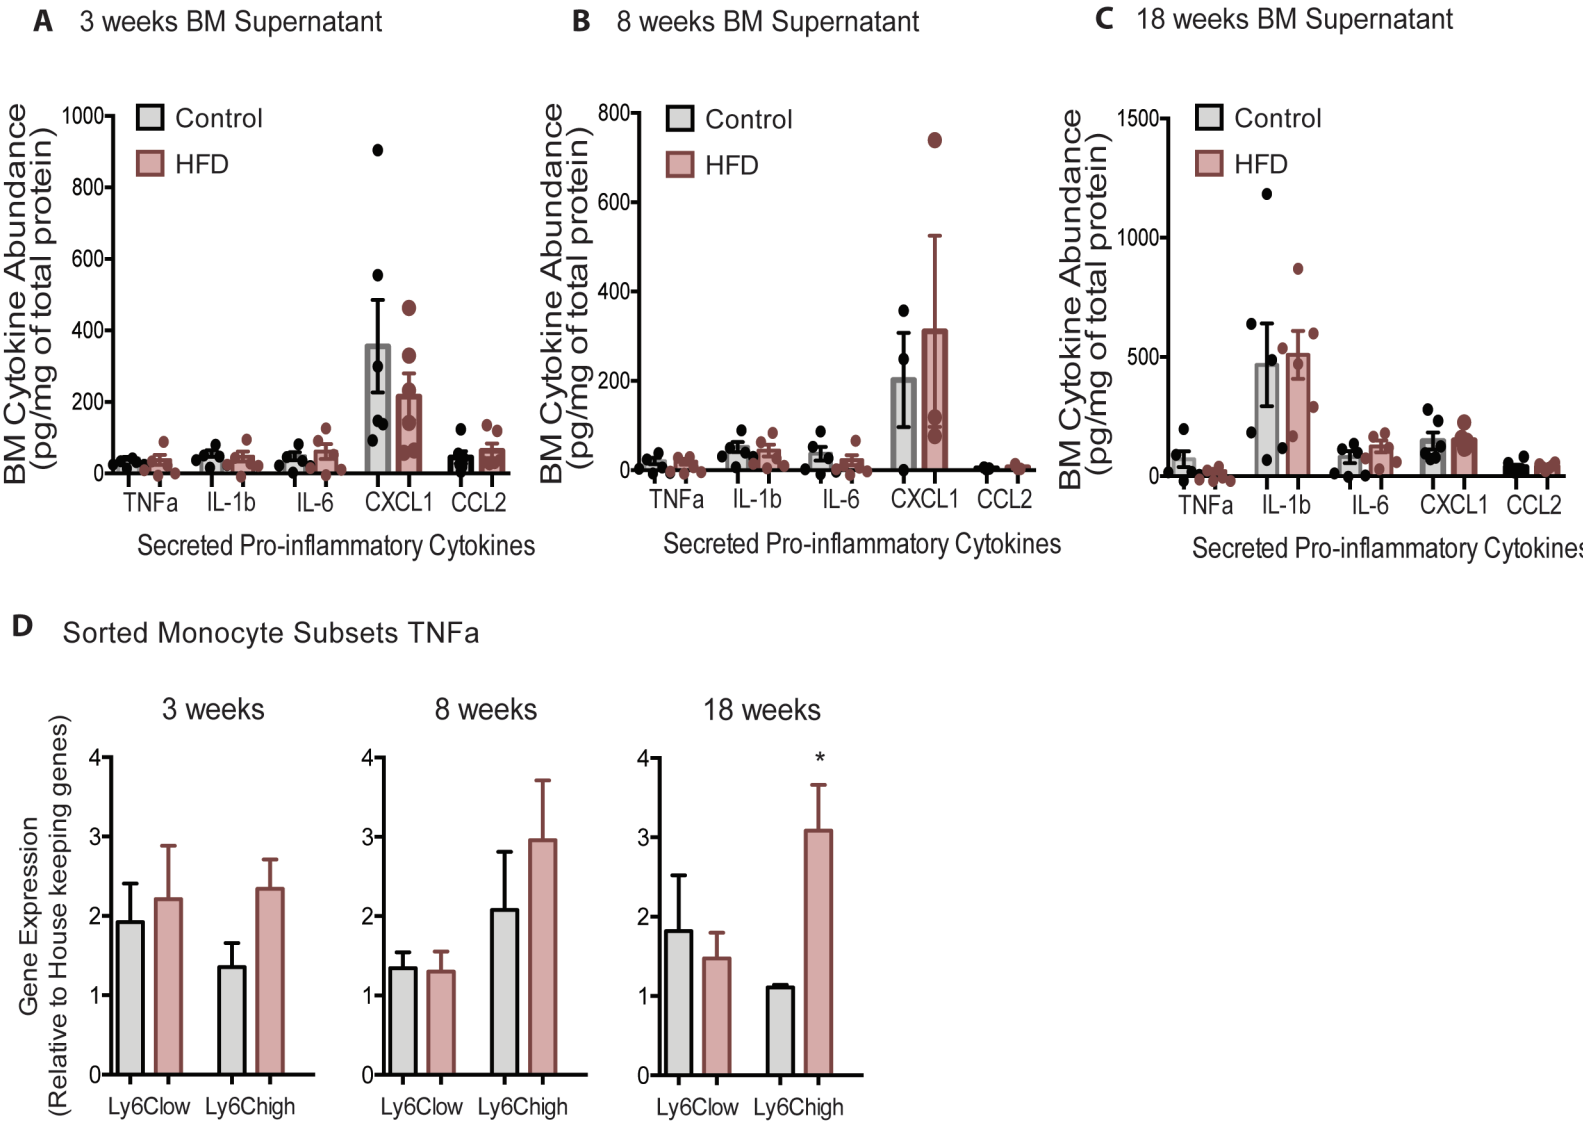

Supplement: supp [file elife-65553-supp-v1.zip]

**Figure 7-figure supplement 1**

**A**

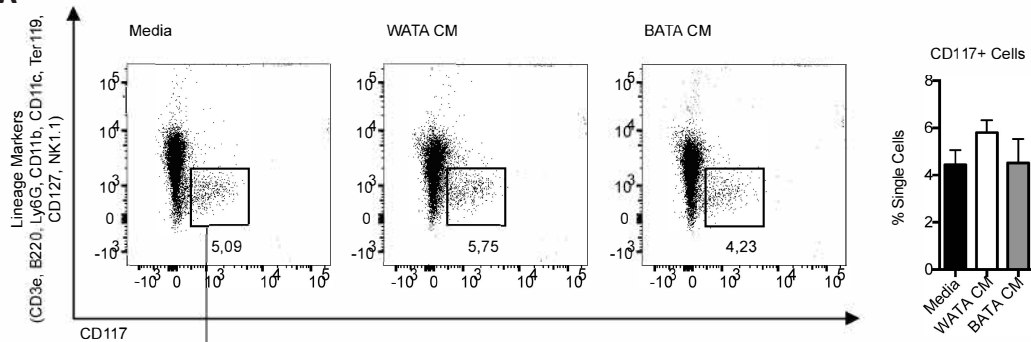

**B**

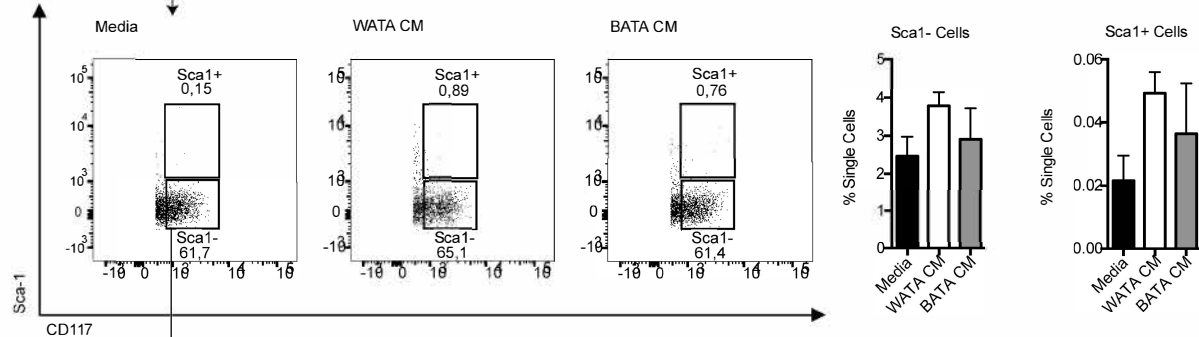

**C**

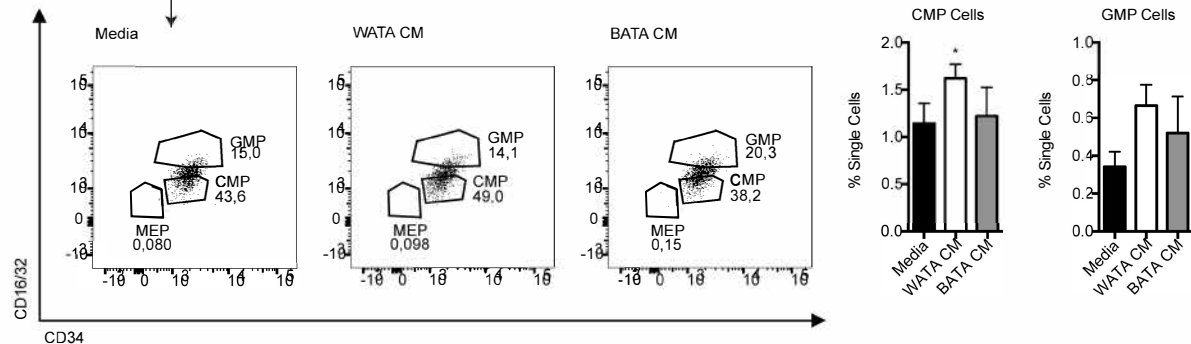

Supplement: supp [file elife-65553-supp-v1.zip]
